# Supplementary material for: Transcriptomic and Metatranscriptomic Analyses Provide New Insights into the Response of the Pea Aphid Acyrthosiphon pisum (Hemiptera: Aphididae) to Acetamiprid
Source: MDPI journal article supplement (doi:10.3390/insects15040274), 2024-04-15
Supplement: s1 [file s1]

**Supplementary Table S1 Summary of transcriptomic sequencing data**

| Sample | Total Raw Reads (M) | Total Clean Reads (M) | Total Clean Bases (Gb) | Clean Reads Q20 (%) | Clean Reads Q30 (%) | Clean Reads Ratio (%) |
|--------|---------------------|-----------------------|------------------------|---------------------|---------------------|-----------------------|
| RS_1   | 45.57               | 42.73                 | 6.41                   | 97.67               | 93.71               | 93.76                 |
| RS_2   | 45.57               | 43.33                 | 6.5                    | 97.34               | 92.81               | 95.07                 |
| RS_3   | 45.57               | 43.34                 | 6.5                    | 97.28               | 92.72               | 95.09                 |
| SS_1   | 45.57               | 42.47                 | 6.37                   | 97.05               | 92.39               | 93.19                 |
| SS_2   | 45.57               | 42.16                 | 6.32                   | 97.09               | 92.53               | 92.5                  |
| SS_3   | 47.33               | 42.62                 | 6.39                   | 97.02               | 92.35               | 90.06                 |

**Supplementary Table S2 Summary of metatranscriptomic sequencing data**

| Sample | Raw reads | Clean reads | Clean bases | Q20 (%) | Q30 (%) | GC (%) |
|--------|-----------|-------------|-------------|---------|---------|--------|
| RS_1   | 240762172 | 240762172   | 24055600772 | 100     | 100     | 53.29  |
| RS_2   | 240883554 | 240883554   | 24058671924 | 100     | 100     | 52.86  |
| RS_3   | 240268794 | 240268794   | 24006344364 | 100     | 100     | 52.53  |
| SS_1   | 240545312 | 240545312   | 24029416710 | 100     | 100     | 51.56  |
| SS_2   | 240341504 | 240341504   | 24003051416 | 100     | 100     | 52.15  |
| SS_3   | 240284986 | 240284986   | 24011438320 | 100     | 100     | 52.81  |
